# Supplementary material
Source: PubMed Central journal article supplement (PMC7958436)
Supplement: pnas.2021048118.sapp.pdf [file pnas.2021048118.sapp.pdf]

## Supplementary Information for

Posttranslational regulation of multiple clock-related transcription factors triggers cold-inducible gene expression in *Arabidopsis*

Satoshi Kidokoro, Kentaro Hayashi, Hiroki Haraguchi, Tomona Ishikawa, Fumiyuki Soma, Izumi Konoura, Satomi Toda, Takamasa Suzuki, Kazuo Shinozaki, Kazuko Yamaguchi-Shinozaki

\*Corresponding Authors: Kazuko Yamaguchi-Shinozaki, Kazuo Shinozaki and Satoshi Kidokoro

Email: akys@g.ecc.u-tokyo.ac.jp, kazuo.shinozaki@riken.jp, akido@g.ecc.u-tokyo.ac.jp

### This PDF file includes:

Figures S1 to S13  
Tables S1 to S2  
Legends for Datasets S1  
SI References

### Other supplementary materials for this manuscript include the following:

Datasets S1

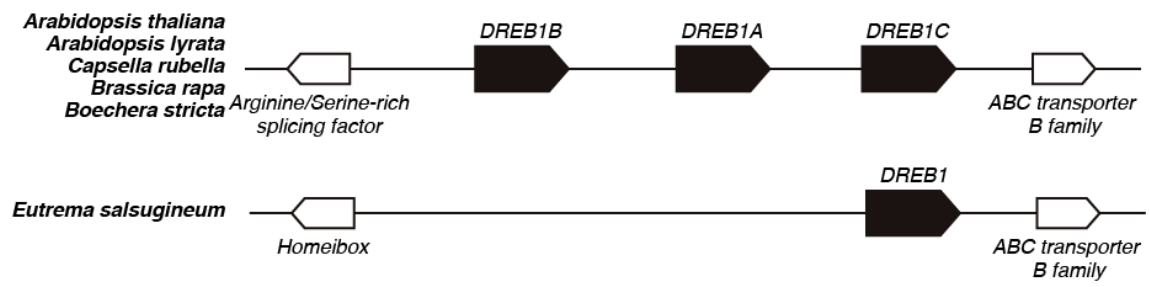

**Fig. S1.** Genomic structure of the *DREB1* genes in five Brassicaceae species.

**A**

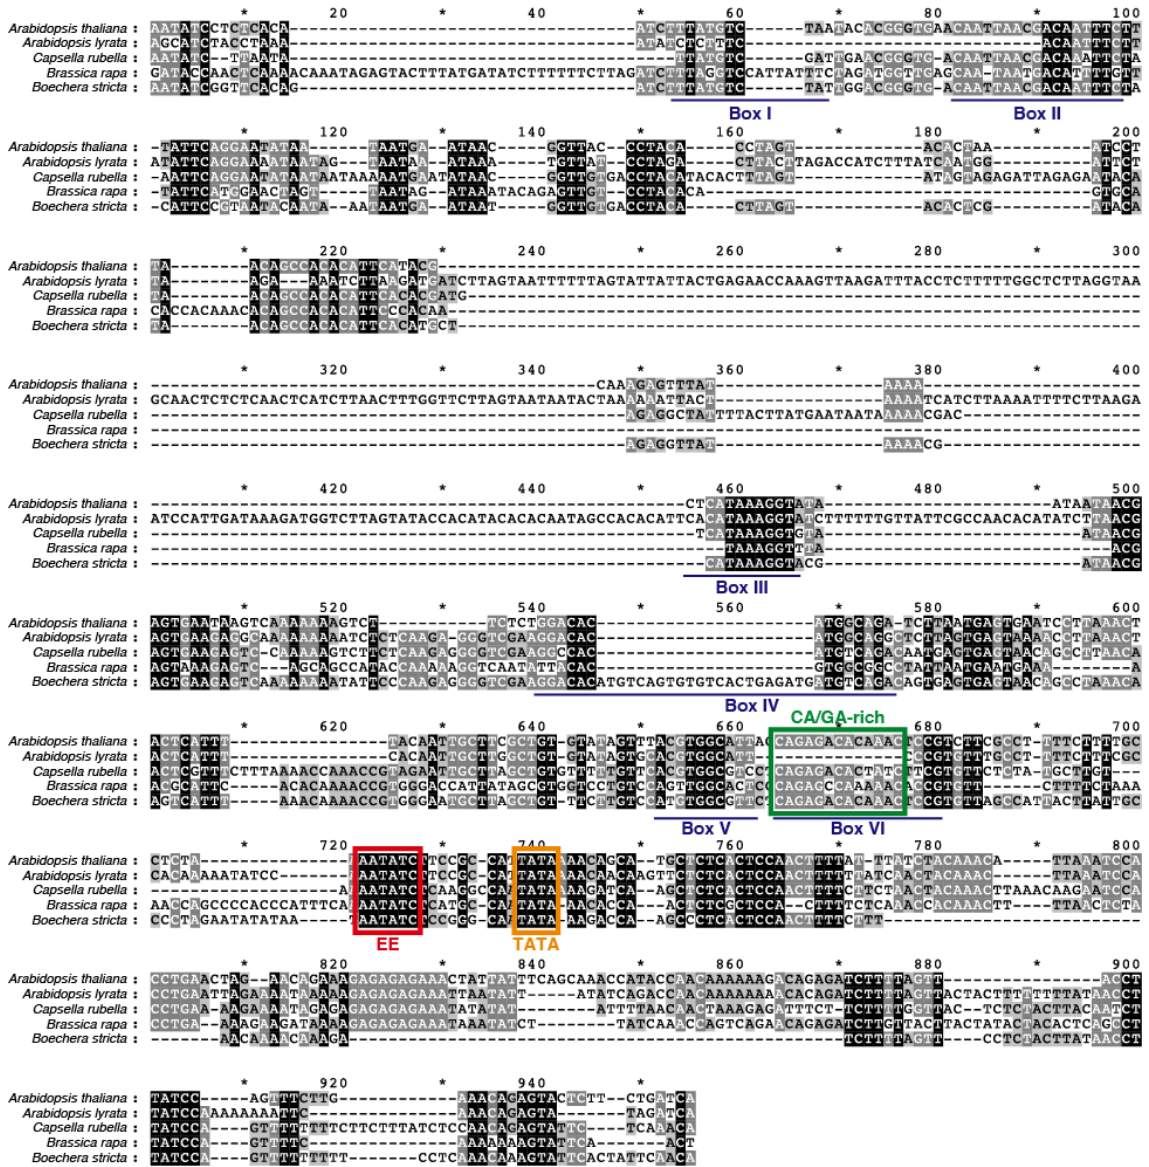

**Fig. S2.** Alignment of promoter sequences of the *DREB1* genes in Brassicaceae species. Promoter sequences of *DREB1A* (A), *DREB1B* (B) and *DREB1C* (C) in five Brassicaceae species are aligned. Blue lines indicate the conserved regions of the three *DREB1* promoters in *Arabidopsis thaliana*, named Box I to VI (1).



C

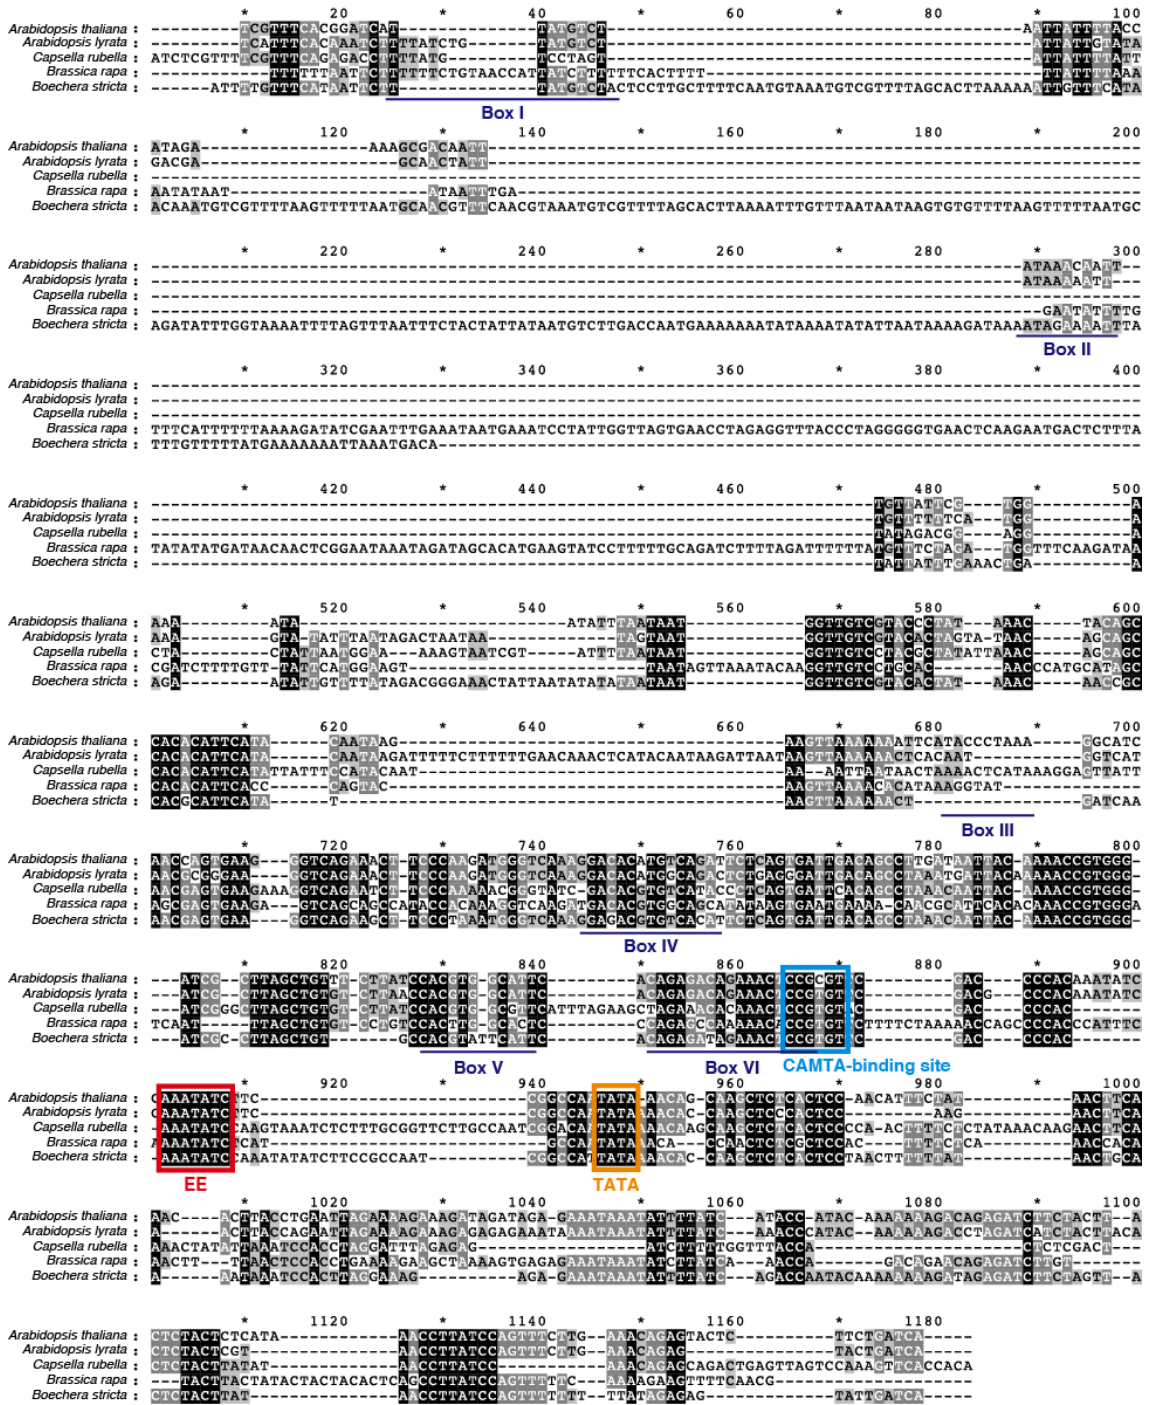

Fig. S2. (continued)



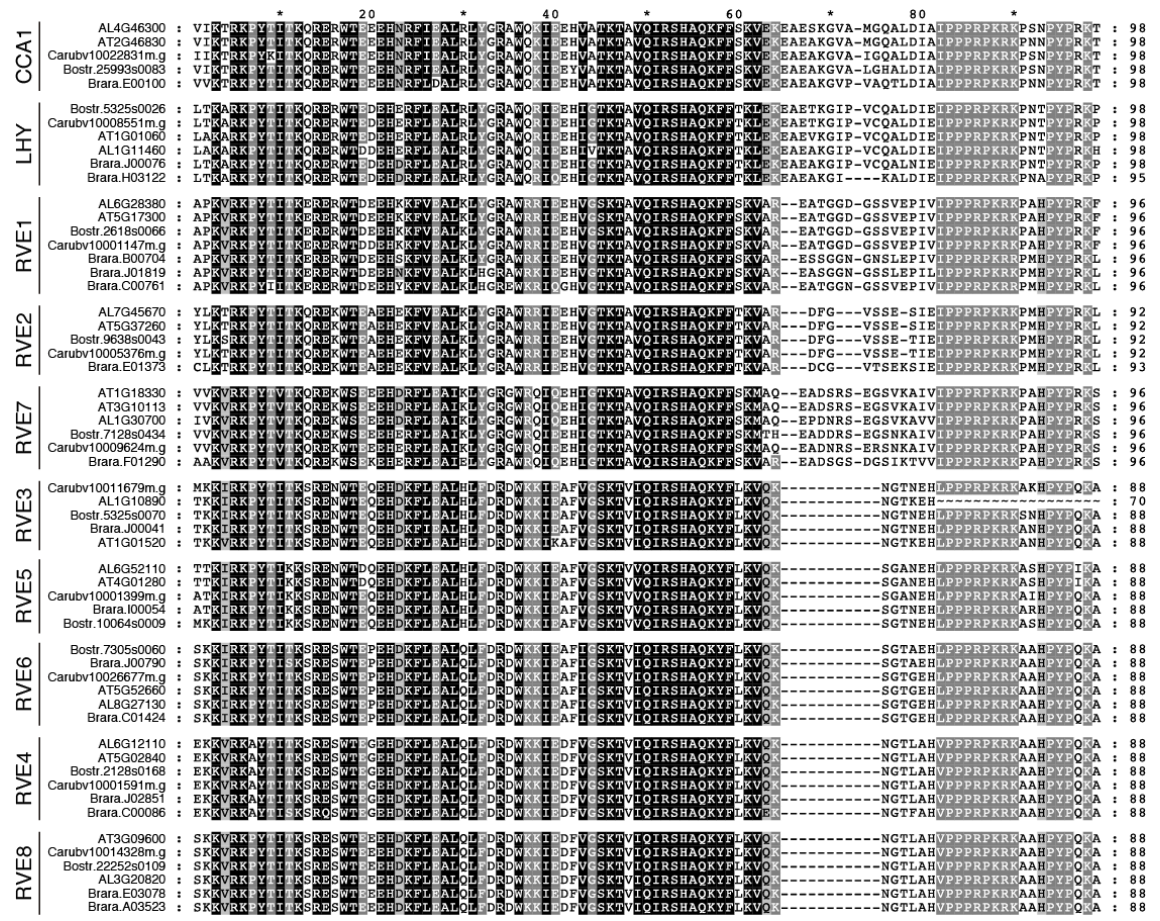

**Fig. S3.** Alignment of the MYB binding domains of the CCA1, LHY, and RVE transcription factors in Brassicaceae species.

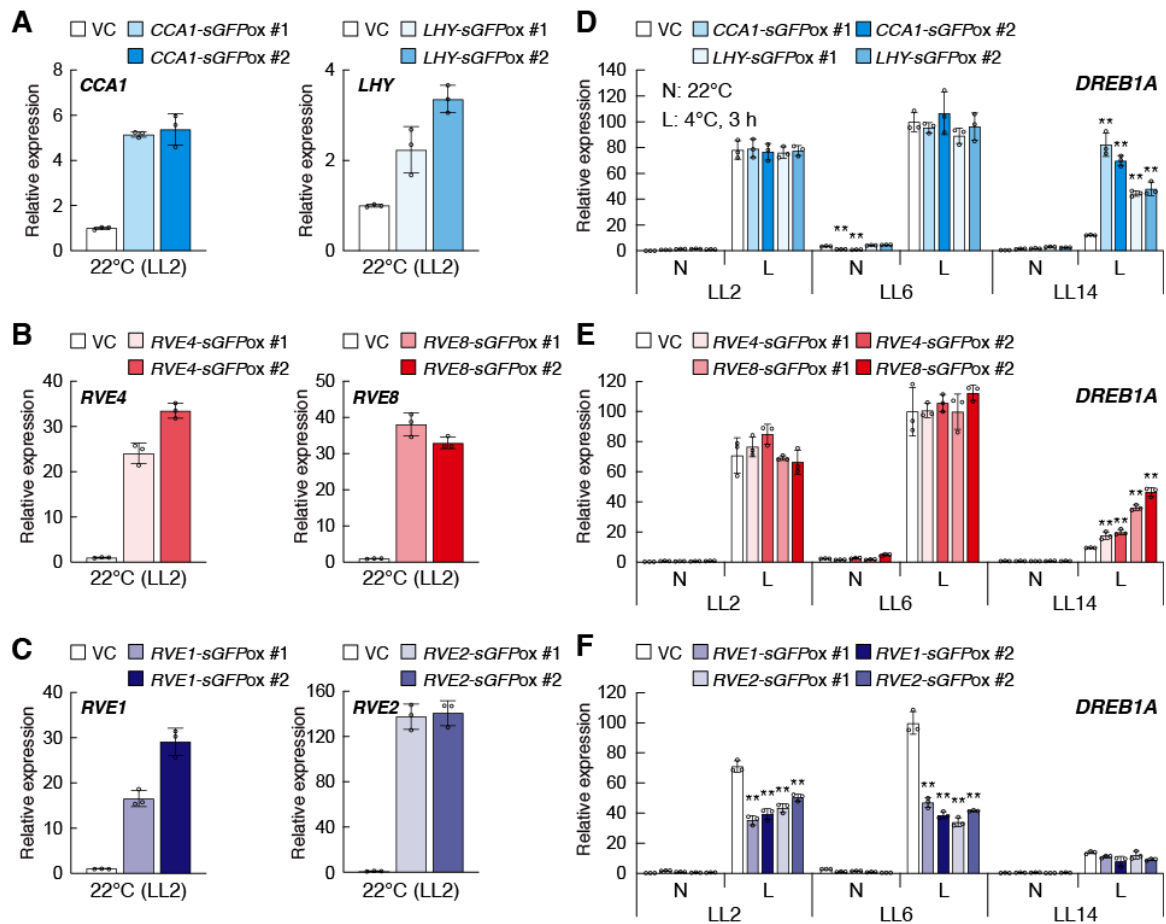

**Fig. S4.** Cold-inducible *DREB1A* expression in the *CCA1*, *LHY* and *RVEs* overexpression plants. (A-C) Expression levels of each transgene in transgenic *Arabidopsis* overexpressing the *GFP* fusion genes of *CCA1*, *LHY* and *RVEs*. (D-F) Cold-inducible *DREB1A* expression in the overexpression plants. The *GFP* fusion genes of *CCA1/LHY* (A, D), *RVE4/RVE8* (B, E) and *RVE1/RVE2* (C, F) were overexpressed using the CaMV 35S promoter in transgenic *Arabidopsis*. Two-week-old seedlings grown on agar plates were gradually chilled at 4°C for 3 h beginning 2 h (LL2), 6 h (LL6) and 14 h (LL14) after dawn. Gene expression before (N) and after cold stress (L) was measured. The asterisks indicate significant differences (\*\* $P < 0.01$ ) as analyzed by one-way ANOVA followed by a Tukey's post hoc test) compared with the expression levels in the VC plants at each time point.

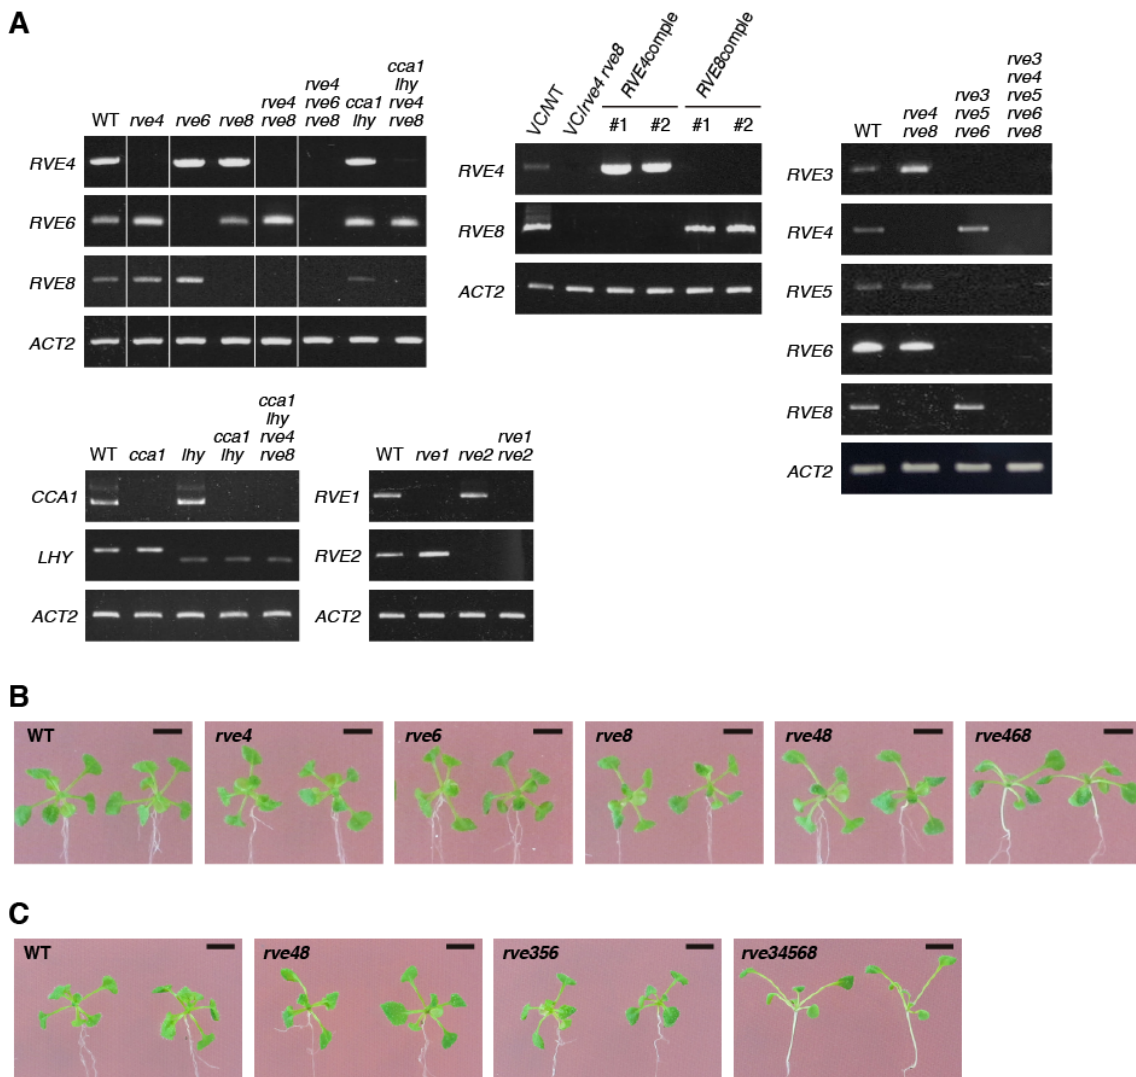

**Fig. S5.** Generation of multiple mutant plants of *CCA1*, *LHY* and *RVEs*. (A) Presence or absence of each transcript in each mutant plant was determined by derived cleaved amplified polymorphic sequences (dCAPS) assay for the *LHY* genes and RT-PCR for the *CCA1* and *RVE* genes. (B, C) Plant growth of the mutant plants of *RVE* genes used in Fig. 2A (B) and 2C (C). Sixteen-day-old seedlings grown on agar medium are shown. Black bars indicate 5 mm.



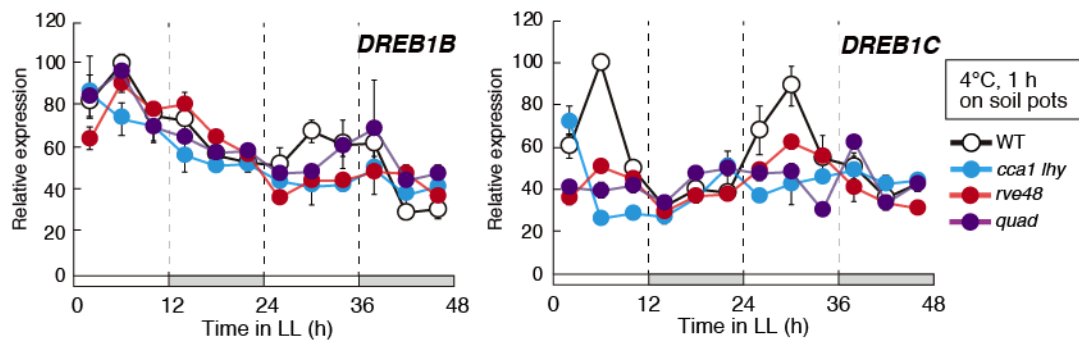

**Fig. S6.** Effects of the circadian clock on the expression of the *DREB1B* and *DREB1C* genes in response to the rapid temperature decrease. Two-week-old seedlings grown in soil pots under a 12-h light/12-h dark cycle were transferred to free-running conditions under continuous light from dawn. Cold treatments were initiated every 4 h from 2 h to 46 h after the beginning of the free-running conditions. At each time point, the seedlings were rapidly cooled at 4°C for 1 h. The transcript levels of each gene in the plants treated at 4°C were measured using the same samples as in Fig. 2G.

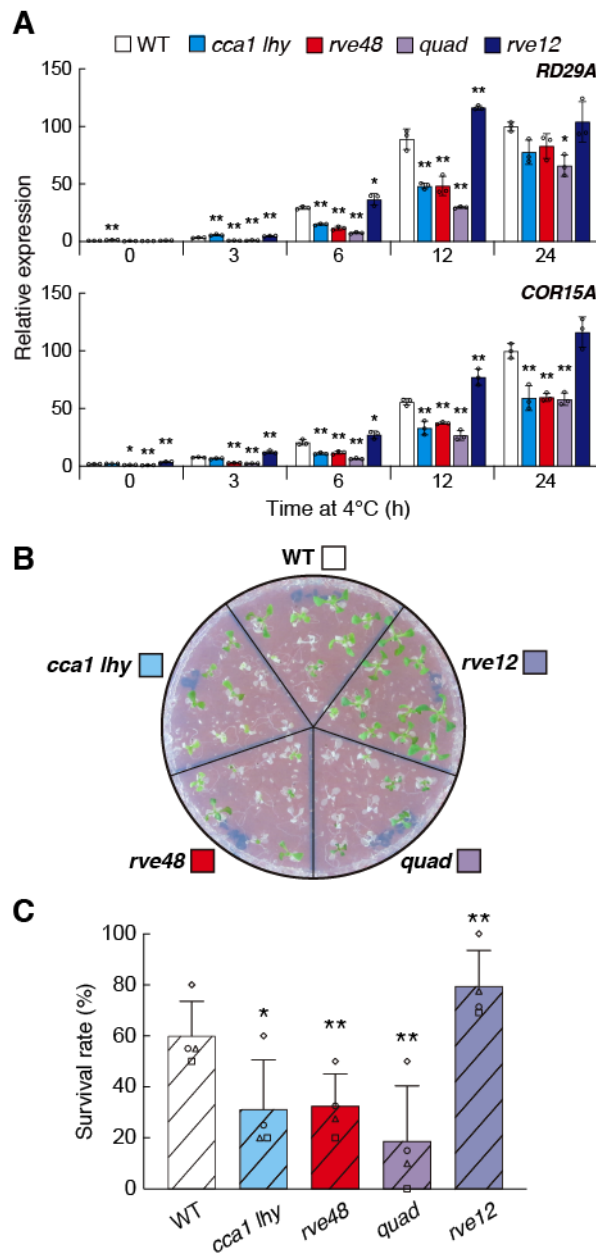

**Fig. S7.** Freezing tolerance of the multiple mutant plants of *CCA1*, *LHY* and *RVEs*. (A) Cold-inducible expression of genes downstream of DREB1 in the mutant plants of *CCA1*, *LHY* and *RVEs*. The asterisks indicate significant differences ( $*P < 0.05$ ,  $**P < 0.01$  as analyzed by one-way ANOVA followed by a Tukey's post hoc test) compared with the WT plants at each time point. (B, C) Freezing tolerance test. Non-acclimated seedlings were treated at  $-9^{\circ}\text{C}$  for 0.5 h. Representative images (B) and survival rates (C) of the plants after recovery are shown. The symbols in the graph indicate the survival rate in four independent experiments. The asterisks indicate significant differences ( $*P < 0.05$ ,  $**P < 0.01$  as analyzed by one-way repeated measures ANOVA followed by a Tukey's post hoc test) compared with the WT plants at each time point.

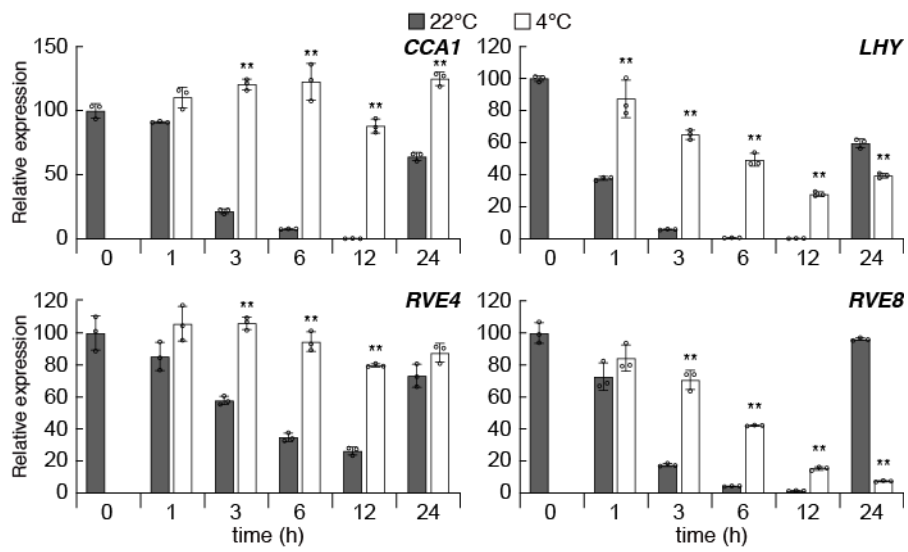

**Fig. S8.** Expression of *CCA1*, *LHY* and *RVEs* under cold stress conditions. Two-week-old seedlings grown in agar plates under a 12-h light/12-h dark cycle were incubated at 22°C or 4°C under continuous light from LL2. The bars refer to the means  $\pm$  standard deviation of three biological replicates. The asterisks indicate significant differences (\*\* $P < 0.01$  according to Student's *t*-test) compared with the expression in the WT plants at 22°C.

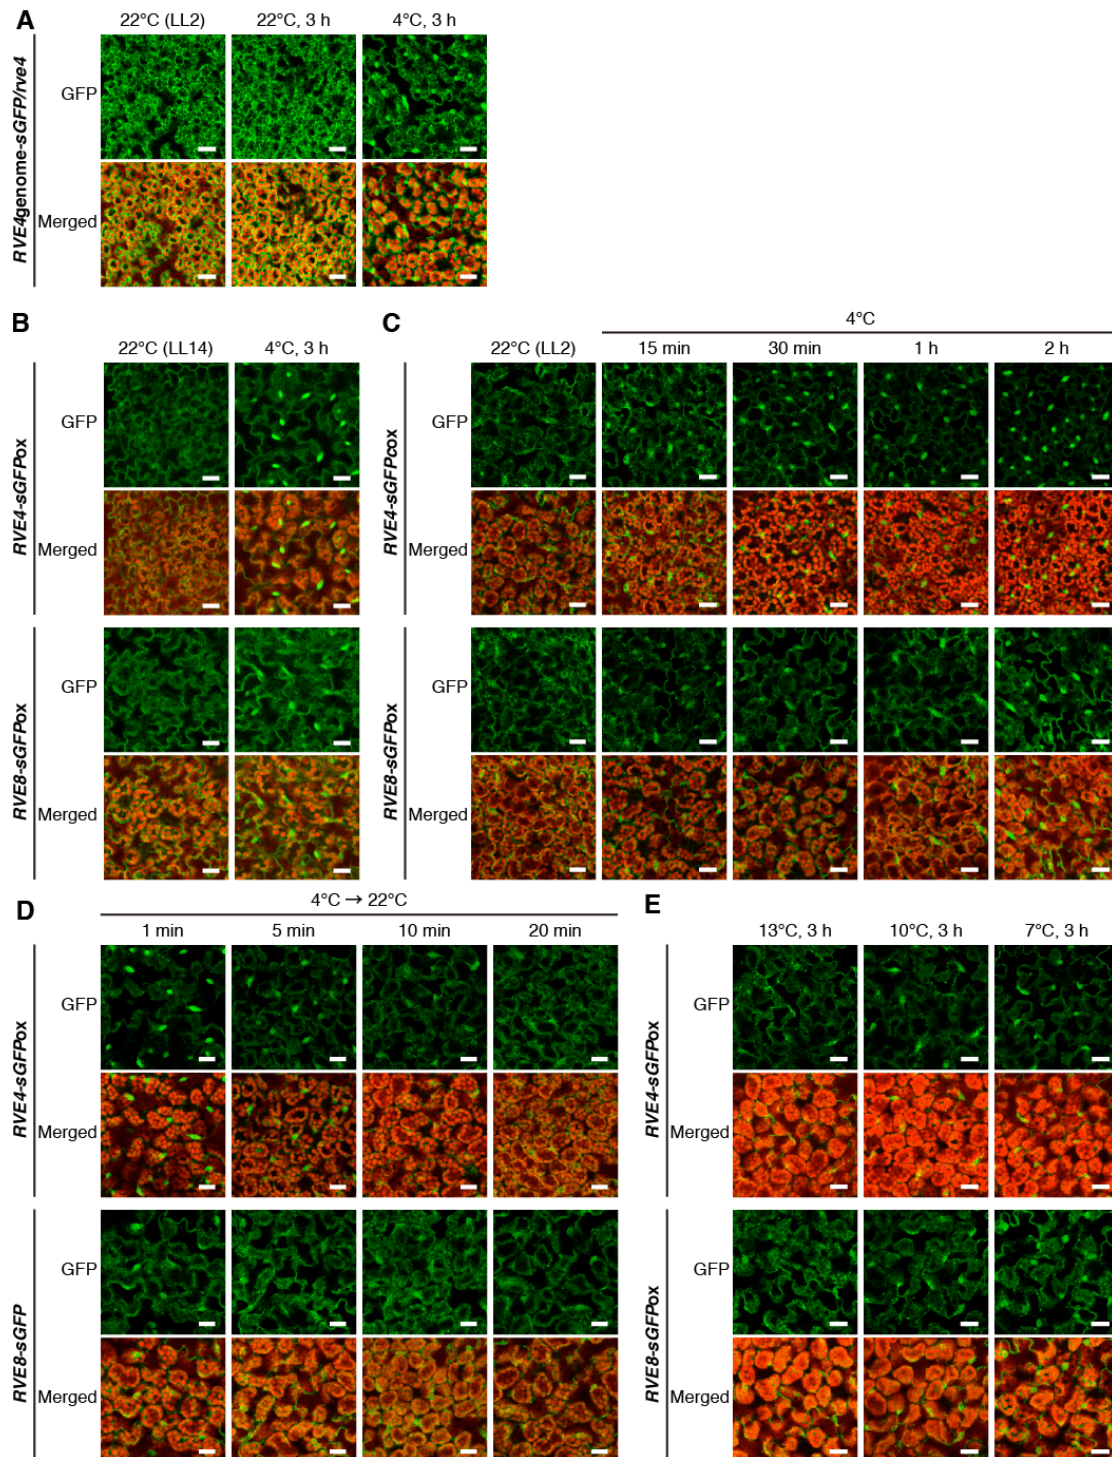

**Fig. S9.** Subcellular localization of RVE4 and RVE8 in transgenic *Arabidopsis* plants. (A) Subcellular localization of RVE4-sGFP driven by its own promoter in transgenic *Arabidopsis* plants. (B, C) Subcellular localization of RVE4-sGFP and RVE8-sGFP under cold stress conditions from 14 h (B, LL14) and 2 h (C, LL2) after dawn. (D) Subcellular localization of RVE4-sGFP and RVE8-sGFP under the recovery treatment from 4°C to 22°C. (E) Subcellular localization of RVE4-sGFP and RVE8-sGFP in response to various temperature decreases. Two-week-old seedlings overexpressing *RVE4-sGFP* and *RVE8-sGFP* driven by the CaMV 35S promoter were used for GFP observation. Bars indicate 20 μm.

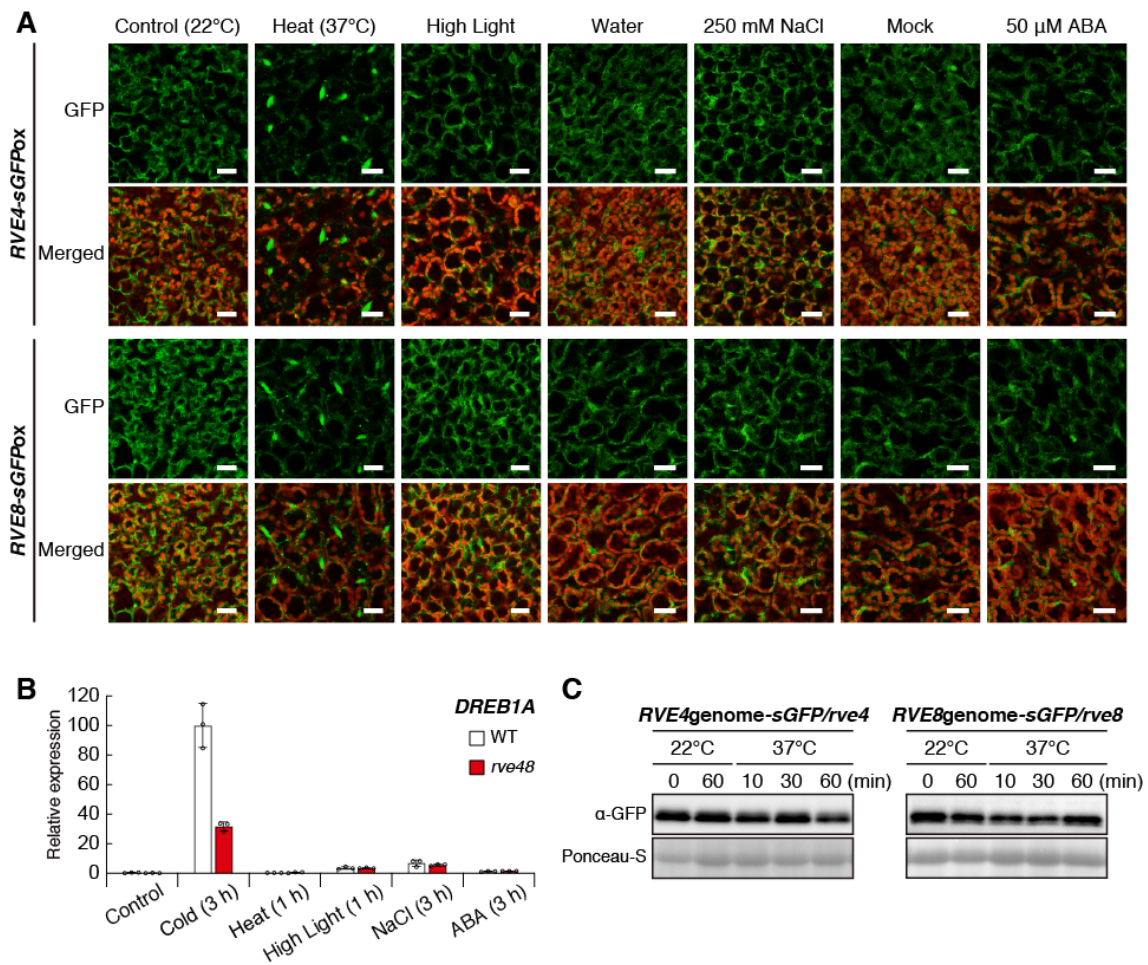

**Fig. S10.** Subcellular localization of RVE4-sGFP and RVE8-sGFP and expression of *DREB1A* under various stress treatments. (A) Subcellular localization of RVE4-sGFP and RVE8-sGFP under various stress treatments, such as heat stress (37°C), high light stress (1000  $\mu$ E), high salinity stress (250 mM NaCl) and ABA (50  $\mu$ M) treatment. Bars indicate 20  $\mu$ m. (B) Expression levels of *DREB1A* under various stress treatments. The bars refer to the means  $\pm$  standard deviation of triplicates. Two-week-old seedlings overexpressing *RVE4-sGFP* and *RVE8-sGFP* driven by the CaMV 35S promoter were used for GFP observation. (C) Immunoblot analyses using transgenic *Arabidopsis* plants expressing *RVE4-sGFP* and *RVE8-sGFP* driven by their own promoters. Two-week-old seedlings grown on agar plates were warmed at 37°C up to 1 h from LL2.



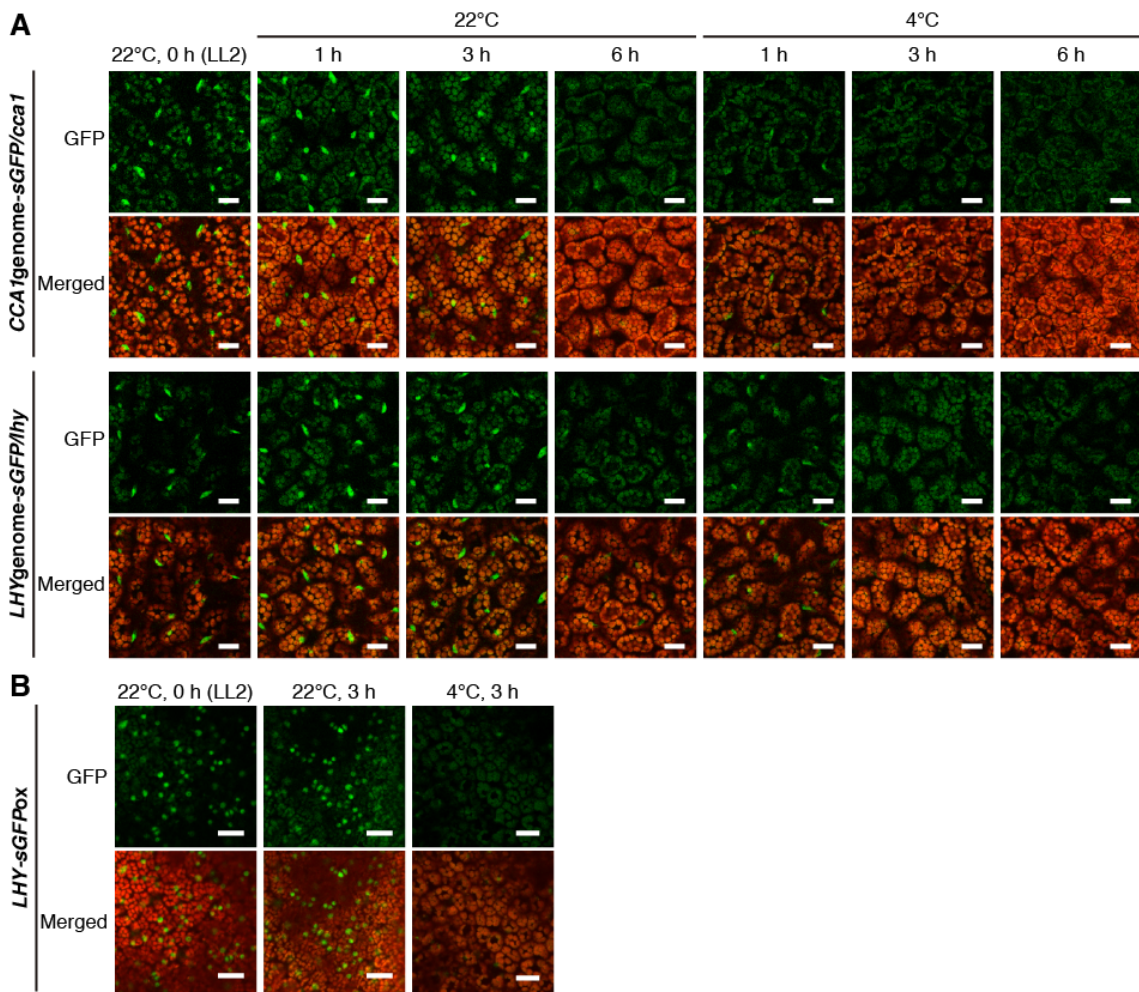

**Fig. S11.** GFP fluorescence of CCA1-sGFP and LHY-sGFP in response to cold stress. (A) GFP fluorescence of CCA1-sGFP and LHY-sGFP driven by their own promoters in transgenic *Arabidopsis*. Two-week-old seedlings overexpressing the GFP fusion genes of the genomic fragments, including the promoter regions of *CCA1* and *LHY*, were used for GFP observation. (B) GFP fluorescence of LHY-sGFP in transgenic *Arabidopsis* plants. Two-week-old seedlings overexpressing *LHY-sGFP* driven by the CaMV 35S promoter in Fig. S4 were used for GFP observation. Bars indicate 20  $\mu$ m.

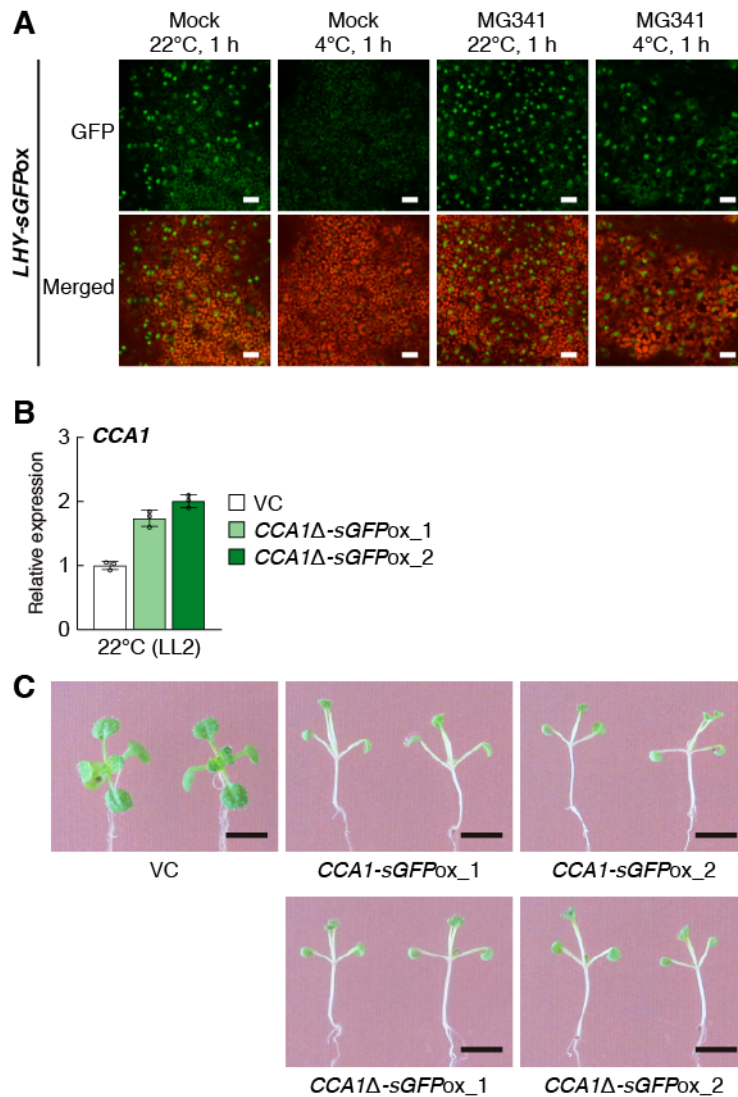

**Fig. S12.** Regulation of *CCA1* and LHY stability. (A) Effect of a 26S proteasome inhibitor on the cold response of LHY-sGFP. Two-week-old seedlings overexpressing *LHY-sGFP* driven by the CaMV 35S promoter were used for GFP observation. White bars indicate 20  $\mu$ m. (B) Expression levels of the transgene in transgenic *Arabidopsis* overexpressing the *sGFP* fusion gene of *CCA1Δ*. (C) Plant growth of the transgenic plants overexpressing the *sGFP* fusion gene of *CCA1* and *CCA1Δ*. Ten-day-old seedlings grown on agar medium are shown. The *CCA1-sGFP*-overexpressing plants are the same lines as shown in Fig. S4. Black bars indicate 5 mm.

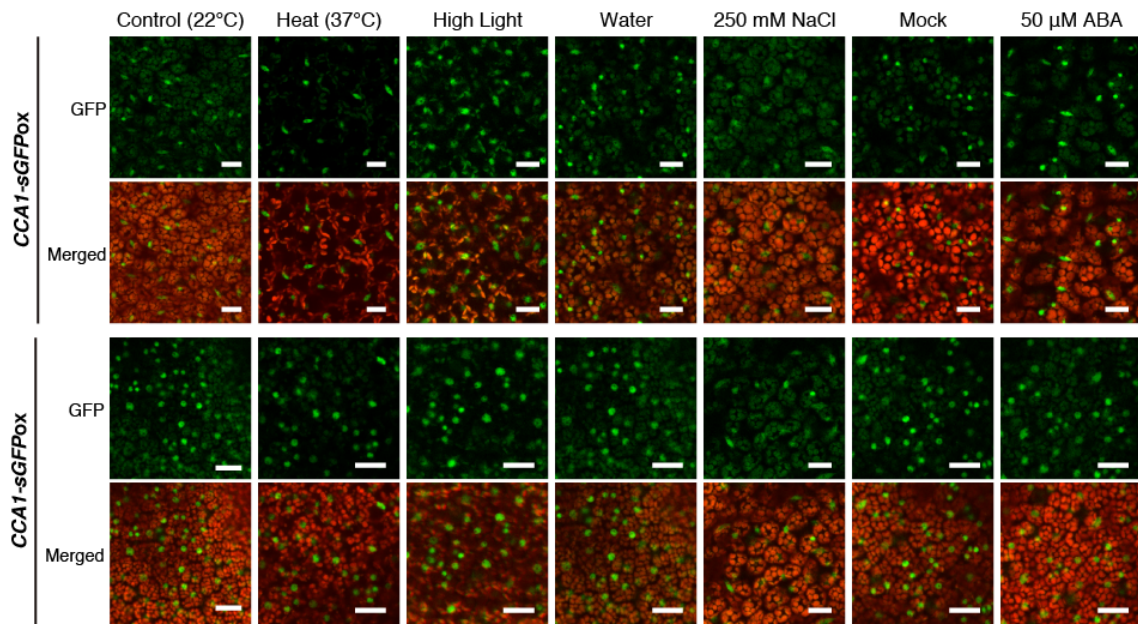

**Fig. S13.** Subcellular localization of CCA1-sGFP and LHY-sGFP under various stress treatments, such as heat stress (37°C), high light (1000  $\mu$ E), high salinity stress (250 mM NaCl) and ABA (50  $\mu$ M) treatment. Two-week-old seedlings overexpressing *CCA1-sGFP* and *LHY-sGFP* driven by the CaMV 35S promoter were used for GFP observation. Bars indicate 20  $\mu$ m.

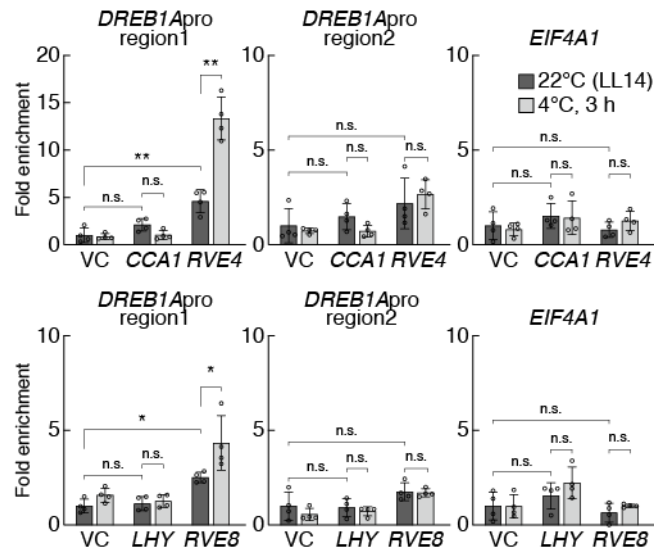

**Fig. S14** ChIP assays of the CCA1, LHY and RVE proteins under the cold stress at subjective night. Enrichment of two regions around EEs in the *DREB1A* promoter (1 and 2; Fig. 6A) was measured using ChIP-qPCR analyses. The transgenic *Arabidopsis* plants used in Fig. 4A and Fig. 5A were analyzed. The cold stress treatment was started 14 h after dawn (LL14). The bars refer to the means  $\pm$  standard deviation in four replicates. The asterisks and "n.s." indicate significant ( $*P < 0.05$ ,  $**P < 0.01$ ) and no differences ( $P > 0.05$ ), respectively, as analyzed by one-way ANOVA followed by a Tukey's post hoc test) between two samples.

**Table S1.** Number of the differential expression genes in the cold stress response and in the mutants.

| # DEG | Cold (WT) |      |
|-------|-----------|------|
|       | 3 h       | 12 h |
| UP    | 557       | 1503 |
| DOWN  | 463       | 3133 |

| # DEG | <i>cca1 lhy</i> |      |      | <i>rve48</i> |     |      | <i>quad</i> |     |      |
|-------|-----------------|------|------|--------------|-----|------|-------------|-----|------|
|       | 0 h             | 3 h  | 12 h | 0 h          | 3 h | 12 h | 0 h         | 3 h | 12 h |
| UP    | 791             | 877  | 1005 | 92           | 282 | 480  | 429         | 760 | 765  |
| DOWN  | 1273            | 1206 | 1246 | 758          | 693 | 653  | 529         | 955 | 884  |



**Table S2.** Oligomers used in this study.

| Name                | Sequence (5'-3')              |
|---------------------|-------------------------------|
| <b>RT-qPCR</b>      |                               |
| DREB1A_qRT_F        | CGCTGACTCGGCTTGA              |
| DREB1A_qRT_R        | GCATCACACATCTCATCCTGAAAC      |
| DREB1B_qRT_F        | AGTCAACATGCGCCAAGGAT          |
| DREB1B_qRT_R        | ATGTCCAGGCCATGATTCG           |
| DREB1C_qRT_F        | TGACGTGTCCTTATGGAGCTA         |
| DREB1C_qRT_R        | CTGCACTCAAAAACATTTGCA         |
| RD29A_qRT_F         | CTTGATGGTCAACGGAAGGT          |
| RD29A_qRT_R         | CAATCTCCGGTACTCCTCCA          |
| COR15A_qRT_F        | GTCAGAGTCGGCCAGAAACTC         |
| COR15A_qRT_R        | AACAACGTAGTCTTTCGCTTTCTCA     |
| CCA1_qRT_F          | GGTGGACTGAGGAAGAAC            |
| CCA1_qRT_R          | GGAGAAAAATTTCTGAGCGTGAC       |
| LHY_qRT_F           | GAAGTCTCCGAAGAGGGTCG          |
| LHY_qRT_R           | TATTCACATTCTCTGCCACTTGAG      |
| RVE4_qRT_F          | GGCGGAAACTTCTACAGATGC         |
| RVE4_qRT_R          | AGCTTTCCTCACCTTCTTCTCC        |
| RVE8_qRT_F          | TCGTGGAGCAGAAGCTGATA          |
| RVE8_qRT_R          | TGGAGGCTGTTTAGCCTTTCTTAC      |
| ELUC_qRT_F          | AGGATCATCATACTGGACTCTGAA      |
| ELUC_qRT_R          | GAAGTTGTGCAGGCTCTCG           |
| IPP2_qRT_F          | GTATGAGTTGCTTCTCCAGCAAAG      |
| IPP2_qRT_R          | GAGGATGGCTGCAACAAGTGT         |
| <b>Construction</b> |                               |
| CCA1pro_F_Apal      | ATTGGGCCCATGCATGGTTAGCTTAG    |
| CCA1_F+1_EcoRV      | GGGATATCCATGGAGACAAATTCG      |
| CCA1_R-3_EcoRV      | GGGATATCTGTGGAAGCTTGAGTTTC    |
| CCA1_1014R_EcoRV    | GGGATATCACCACCTGAACTAAG       |
| CCA1_1327_inverse_F | AGGCAAGAGGATGGCACCAATG        |
| CCA1_1134_inverse_R | CTTTGATGCCTCGGAGTGTTT         |
| LHYpro_F_Apal       | ATTGGGCCCCGGTTATTTCAATTAGATTC |
| LHY_F+1_SmaI        | TCCCCCGGGCATGGATACTAATACATC   |
| LHY_R-3_SmaI        | TCCCCCGGGTGTAGAAGCTTCTCCTTC   |
| RVE1_F+1_SmaI       | TCCCCCGGGCATGGCGTCGTCTCCG     |
| RVE1_R-3_SmaI       | TCCCCCGGGTAAGTGGAGATGAATCTC   |
| RVE2_F+1_SmaI       | TCCCCCGGGGATGGCTATGCAGGAAC    |
| RVE2_R-3_SmaI       | TCCCCCGGGCCACAAAGGATATGA      |
| RVE4pro_F_Apal      | ATTGGGCCCTTTCAACACAACCTTTTAC  |
| RVE4_F+1_SmaI       | TCCCCCGGGGATGACCTCAACCAA      |
| RVE4_R-3_SmaI       | TCCCCCGGGAGAGCTTAAGTGTTT      |
| RVE8pro_F_Apal      | ATTGGGCCCTTGTTGTATTTGTTTCG    |

|                      |                                                        |
|----------------------|--------------------------------------------------------|
| RVE8_F+1_Smal        | TCCCCCGGGGATGAGCTCGTCGCCG                              |
| RVE8_R-3_Smal        | TCCCCCGGGTATGATAAGAGGAC                                |
| SV40NLS_Xbal_S       | <u>CTAGA</u> AATGACTAGTCCTAAGAAGAAGAGGAAGGTTGGAAGTAGTT |
| SV40NLS_Xbal_AS      | <u>CTAGA</u> ACTAGTTCCAACCTTCTTCTTCTTCTTAGGACTAGTCATT  |
| 1AR_F_Xbal           | GCTCTAGAGCTTCGCTGTGTATAG                               |
| 1AR_R_Xbal           | GCTCTAGAAATGGCGGAAGATATTTTAG                           |
| 1AR_mCA/GA_inverse_F | TTTTTTAAACTCCGTCTTCGCCTTTTTC                           |
| 1AR_mCA/GA_inverse_R | AAAGTAATGCCACGTAAACTATACAC                             |
| 1AR_mEE_R_Xbal       | GCTCTAGAAATGGCGGAAAAAAAAAAGAGG                         |

### Genotyping

|             |                                    |
|-------------|------------------------------------|
| LBb1.3_SALK | ATTTTGCCGATTTTCGGAAC               |
| LB1_SAIL    | GCCTTTTCAGAAATGGATAAATAGCCTTGCTTCC |
| rve1_LP     | AAGTGGAGATGAATCTCATGCTC            |
| rve1_RP     | CAAAGACCGCAGTTTCAGATTC             |
| rve2_LP     | CAGATGCCTTTTACCTCAAGG              |
| rve2_RP     | ACGAACACTTCACCACAAAGG              |
| rve3_LP     | TGGCTTTCCACAACCTTCTTG              |
| rve3_RP     | TGTTAGTCCCACGCTCTGAAC              |
| rve4_LP     | AAATCAAACAGGCACAGGATG              |
| rve4_RP     | TTTTTACAACCTTCCACACCGG             |
| rve5_LP     | TTTTGGCAGATTTGTGCGATTC             |
| rve5_RP     | TCCACGCGGACATCTTTATAG              |
| rve6_LP     | GTGAAGAACGAAACAGGCAAG              |
| rve6_RP     | GGAGGGGAGTGAAGCTAATTG              |
| rve8_LP     | TTCAGCAAAATCAGGAACACC              |
| rve8_RP     | AGAGCTGGACAGAGGAAGAGC              |

### RT-PCR

|           |                         |
|-----------|-------------------------|
| CCA1_RT_F | ATGGAGACAAATTCGTCTGGAG  |
| CCA1_RT_R | CTTTGATGCCTCGGAGTGTTT   |
| RVE1_RT_F | ATGGCGTCTGCTCCGTTGACTGC |
| RVE1_RT_R | TTATAAGTGGAGATGAATCTC   |
| RVE2_RT_F | ATGGCTATGCAGGAACG       |
| RVE2_RT_R | TCACCACAAAGGATATGATAA   |
| RVE3_RT_F | ATGGTGACTGTAAACCCTAG    |
| RVE3_RT_R | CTAACTGGCGTTGTAAGATG    |
| RVE4_RT_F | ATGACCTCAACCAATCCG      |
| RVE4_RT_R | CTAAGAGCTTAAGTGTTTCATG  |
| RVE5_RT_F | ATGGTGTCCGTAAACCCTAG    |
| RVE5_RT_R | CTATTTCAAAGCTTTAGCGC    |
| RVE6_RT_F | ATGGTCTCTAGAAATTCTG     |
| RVE6_RT_R | TTAAGTAGAGATTTTCAGGTGG  |
| RVE8_RT_F | ATGAGCTCGTCGCCGTCAAG    |
| RVE8_RT_R | TCATATGATAAGAGGACTTTT   |

**dCAPs**

|                   |                           |
|-------------------|---------------------------|
| lhy_dCAPs_F       | CTCCAATCTTATTATGTCAACTCTC |
| lhy_dCAPs_R_BglII | AGAATTCCCGACTCGCATAGATC   |

**EMSA**

|              |                                        |
|--------------|----------------------------------------|
| 1AR-C_WT_S   | CTAGACTTCGCCTTTTCTTTTGCCTCTAAAATATCTT  |
| 1AR-C_WT_AS  | CTAGAAGATATTTTAGAGGCAAAGAAAAGGCGAAGT   |
| 1AR-C_mEE_S  | CTAGACTTCGCCTTTTCTTTTGCCTCTTTTTTTTTTTT |
| 1AR-C_mEE_AS | CTAGAAAAAAAAAAGAGGCAAAGAAAAGGCGAAGT    |

**ChIP-qPCR**

|                |                           |
|----------------|---------------------------|
| DREB1A_ChIP1_F | TCTCGTTGTCGTCTTGCTTCTC    |
| DREB1A_ChIP1_R | GTCTGCCTCGTTACCTACCTCTCA  |
| DREB1A_ChIP2_F | CAAACCTCCGTCTTCGCCTTTTC   |
| DREB1A_ChIP2_R | GTTGGAGTGAGAGCATGCTGTTTTA |
| EIF4A1_ChIP_F  | TGTTTTGCTTCGTTTCAAGGA     |
| EIF4A1_ChIP_R  | GCATTTTCCCGATTACAAC       |

---

Under bars indicate restriction enzyme sites.

**Dataset S1 (separate file).** List of the changes in gene expression in the cold stress response and mutants.

### **SI References**

1. S. Kidokoro, K. Yoneda, H. Takahashi, F. Takahashi, K. Shinozaki, K. Yamaguchi-Shinozaki, Different cold-signalling pathways function in the responses to rapid and gradual decreases in temperature. *Plant Cell* **29**, 760–774 (2017).
